# Supplementary material
Source: HighWire-hosted journal article supplement (https://erj.ersjournals.com/content/54/5/1901894)
Supplement: inline-supplementary-material-1 [file inline-supplementary-material-1.pdf]

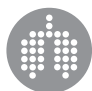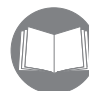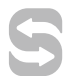

SHAREABLE PDF

# Treatment with inhaled $\alpha$ 1-antitrypsin: a square peg in a round hole?

Miriam Barrecheguren and Marc Miravittles 

**Affiliation:** Pneumology Dept, Hospital Universitari Vall d'Hebron/Vall d'Hebron Research Institute (VHIR), Barcelona, Spain.

**Correspondence:** Marc Miravittles, Pneumology Dept, Hospital Universitari Vall d'Hebron, P. Valld'Hebron 119-129. 08035 Barcelona, Spain. E-mail: marcmm@separ.es

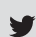

@ERSpublications

**Inhaled  $\alpha$ 1-antitrypsin may reduce severity of exacerbations in COPD** <http://bit.ly/2OtJx8b>

**Cite this article as:** Barrecheguren M, Miravittles M. Treatment with inhaled  $\alpha$ 1-antitrypsin: a square peg in a round hole?. *Eur Respir J* 2019; 54: 1901894 [<https://doi.org/10.1183/13993003.01894-2019>].

This single-page version can be shared freely online.

$\alpha$ 1-Antitrypsin deficiency (AATD) is a genetic disorder that predisposes to the development of early pulmonary emphysema, especially in smokers. Episodes of exacerbations are frequent in patients with emphysema due to AATD and are associated with a deficient antiprotease screen in the airways compared with that of non-deficient COPD patients [1]. As a consequence, exacerbations have great impact on the evolution of the lung disease in AATD, measured in terms of decline in gas transfer [2], in health status [2, 3], and in lung function over time [4, 5].
